# Supplementary material
Source: publisher site journal article supplement (https://www.spandidos-publications.com/7165/downloadSupplementary)

Figure S1. Uncropped blots. Uncropped western blot images of the blots shown in (A) Fig. 6C, (B) Fig. 7B, (C) Fig. S2A, (D) Fig. S2B and (E) Fig. S2C. GLP-1R, glucagon-like peptide-1 receptor; ACOX1, Acyl-CoA oxidase 1; NC, negative control.

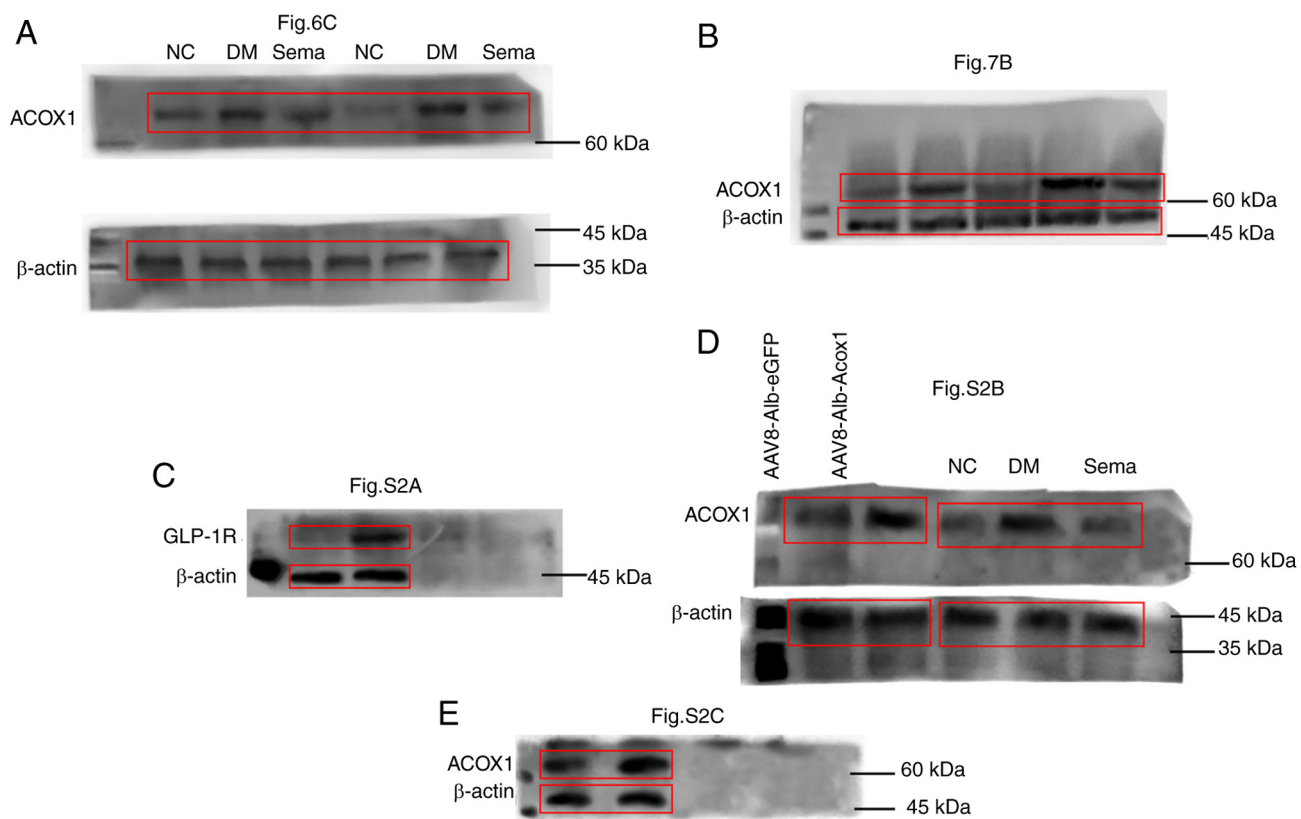

Figure S2. Regulatory effects of AAV, pcDNA3.1 and siRNA. (A) The efficacy of siRNA to inhibit GLP-1R. (B) The efficacy of ACOX1 activation by AAV8-Alb-Acox1. (C) Efficacy of ACOX1 overexpression by pcDNA3.1-ACOX1-GFP. siRNA, small interfering RNA; GLP-1R, glucagon-like peptide-1 receptor; ACOX1, Acyl-CoA oxidase 1.

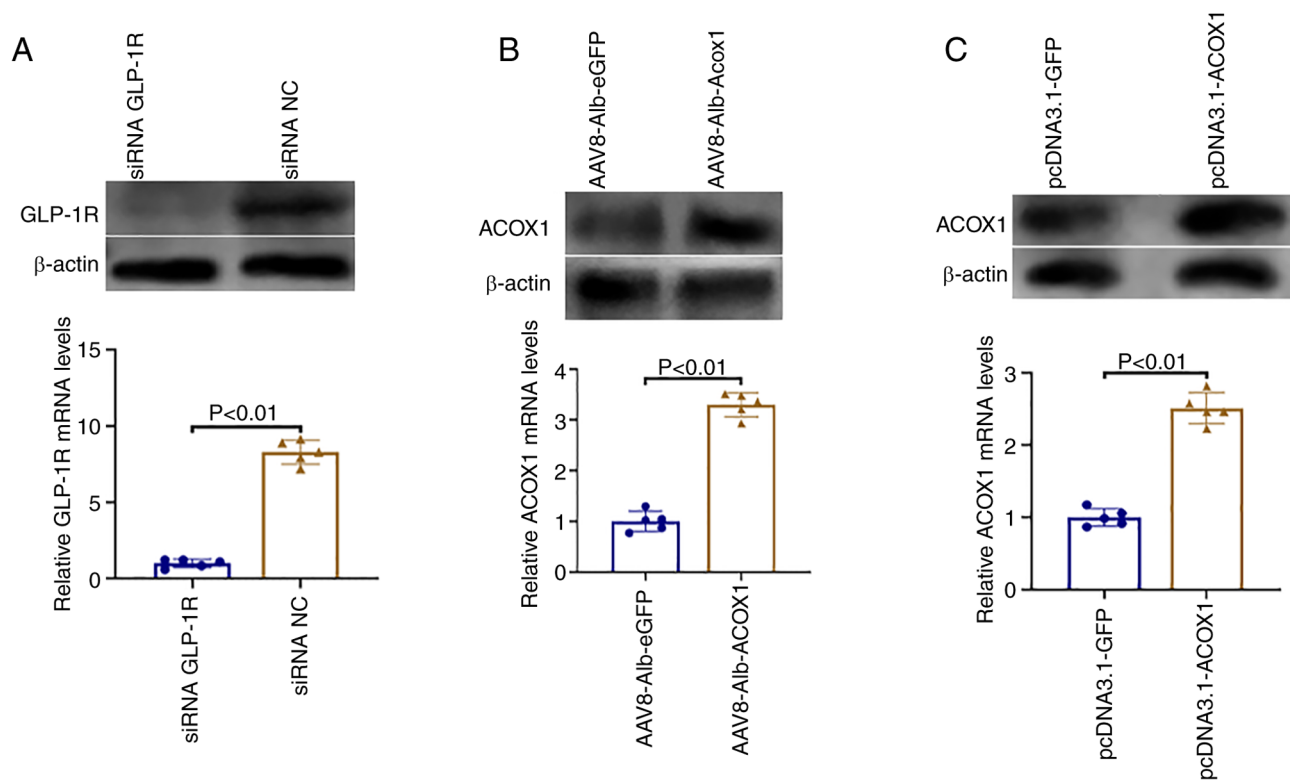

Figure S3. Sample repeatability test in proteome and transcriptome. (A) A plot illustrating the RNA quantitative PCA results for all samples. (B) A boxplot showing the distribution of RNA intensity profile. (C) A heatmap displaying the PCC among proteins of all samples in transcriptome. (D) A plot illustrating the protein quantitative PCA results for all samples in proteome. (E) A boxplot depicting the RSD of protein quantitative values across replicates within each group. (F) A heatmap displaying the PCC among proteins of all samples in proteome. (G) A boxplot showing the distribution of protein intensity profile. (H) Peptide length distribution of the identified peptides. PCA, principal component analysis; PCC, Pearson correlation coefficient; RSD, relative standard deviation; DM, diabetes mellitus; NC, negative control.

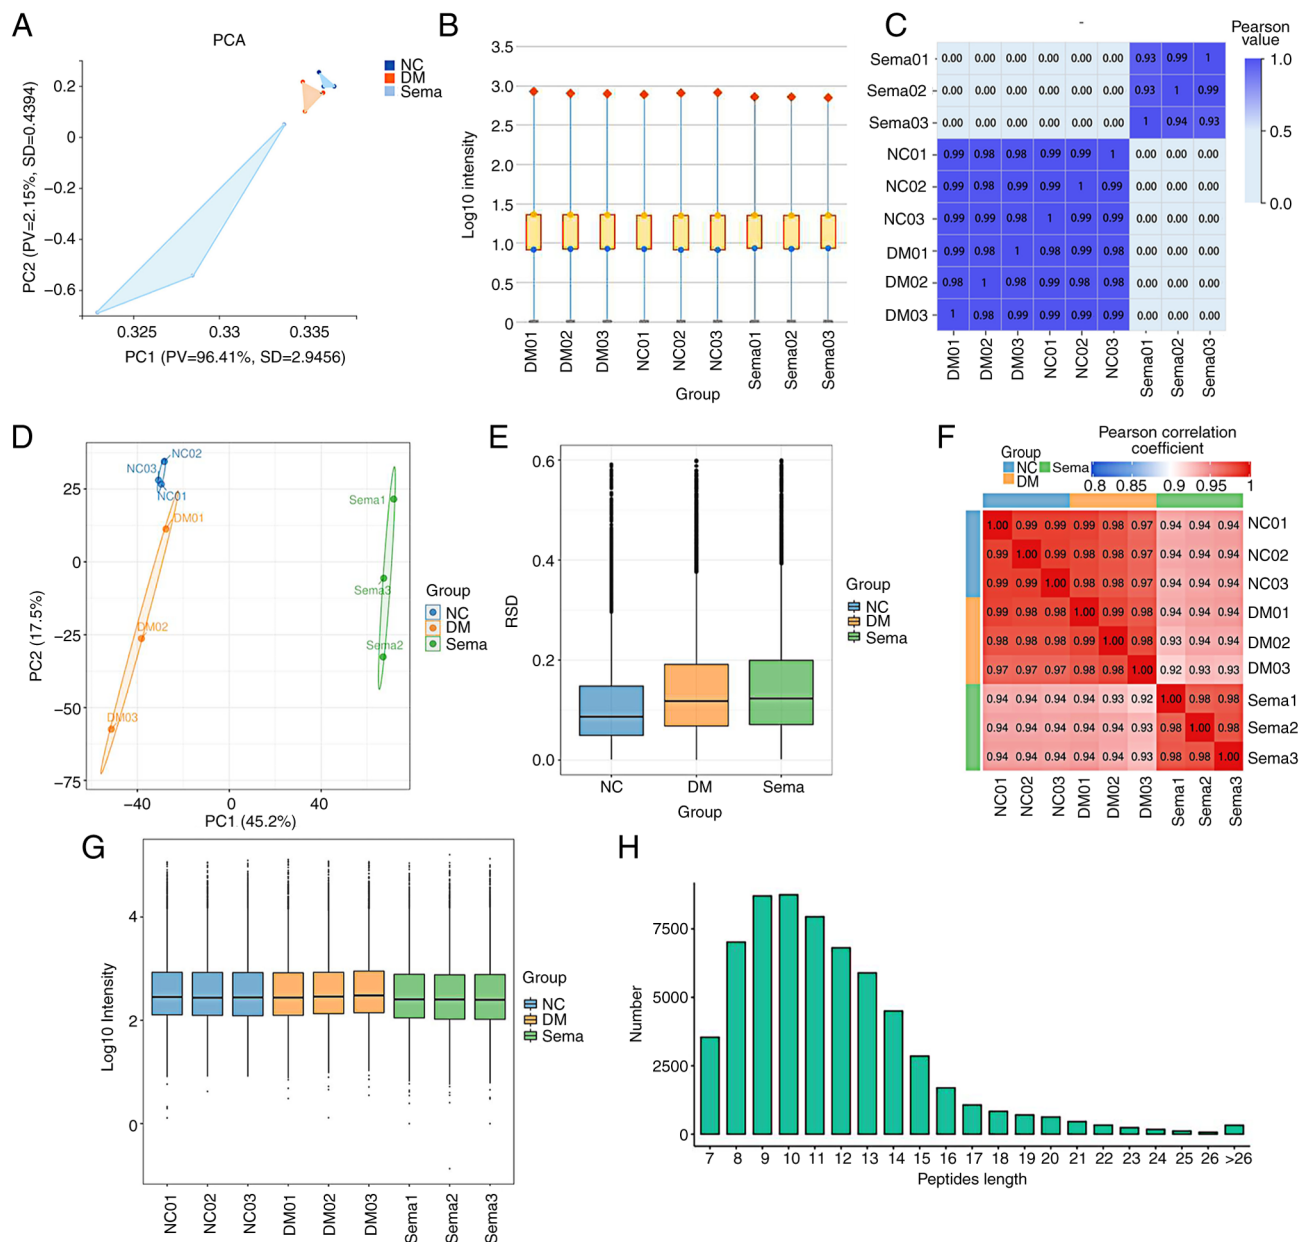

Supplement: Supplementary file 1 [file downloadSupplementary]
